# Supplementary material for: A series of 3D lanthanide frameworks constructed from aromatic multi-carboxylate ligand: Structural diversity, luminescence and magnetic properties
Source: Royal Society of Chemistry journal article supplement (doi:10.1039/c3dt50810b), 2013-01-01
Supplement: c3dt50810b.pdf [file c3dt50810b.pdf]

Electronic Supplementary Information for Dalton. Trans.

## A series of 3D lanthanide frameworks constructed from aromatic multi- carboxylate ligand: structural diversity, luminescence and magnetic properties

Xun Feng <sup>a</sup>, Xun-Li Ling <sup>a</sup>, Lang Liu <sup>c</sup>, Hong-Liang Song <sup>a</sup>, Li-Ya Wang <sup>\*,a, b</sup>,  
Seik-Weng Ng <sup>d,f</sup>, Bei Ya Su <sup>a</sup>

### 1 Additional Figures

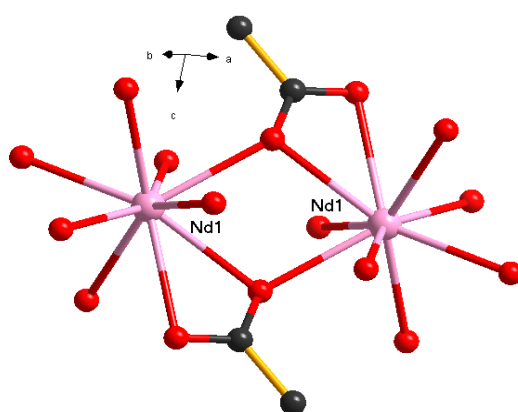

**Fig. S1.** Illustration of an individual dinuclear Nd<sub>2</sub> unit doubly linked by the carboxylic group from Hddp ligands viewed approximately down the *a c*-plane in **1**.

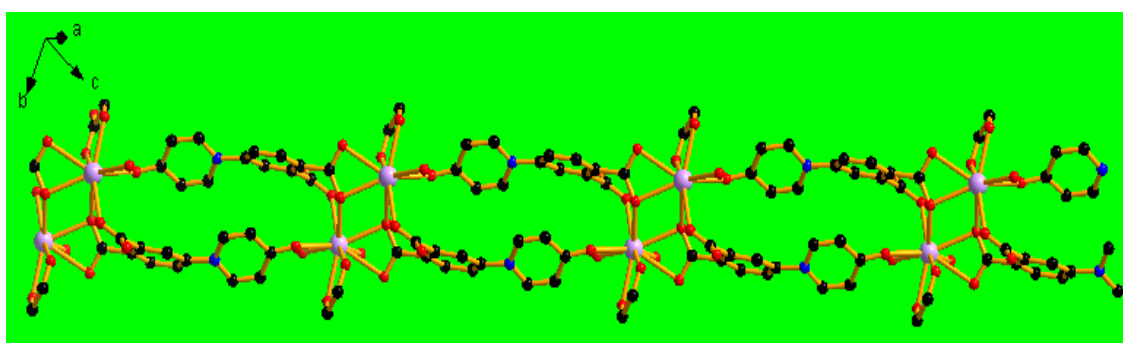

**Fig. S2.** Illustration of 1D double chain linked by the carboxylic group from Hddp ligands viewed along the 011 direction in **1**.

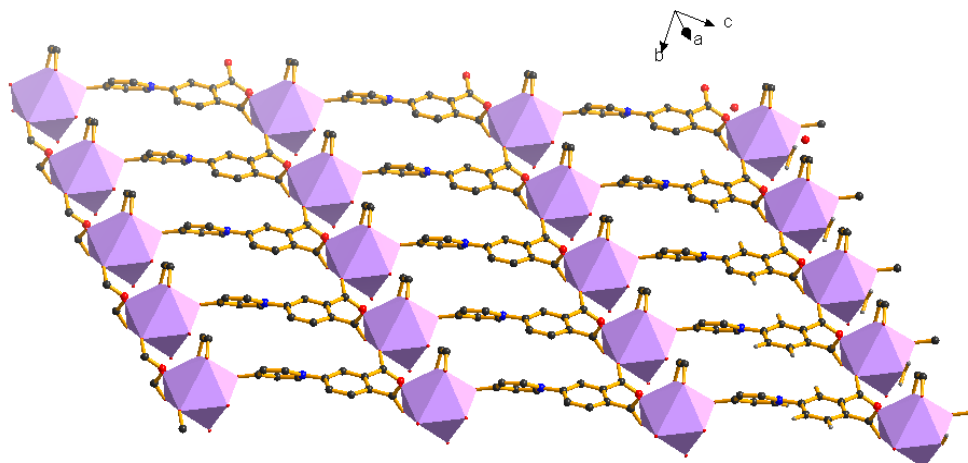

**Fig. S3.** 2D lattice layer constructed from DPPA and Nd(III) ions viewed down *ac* plane

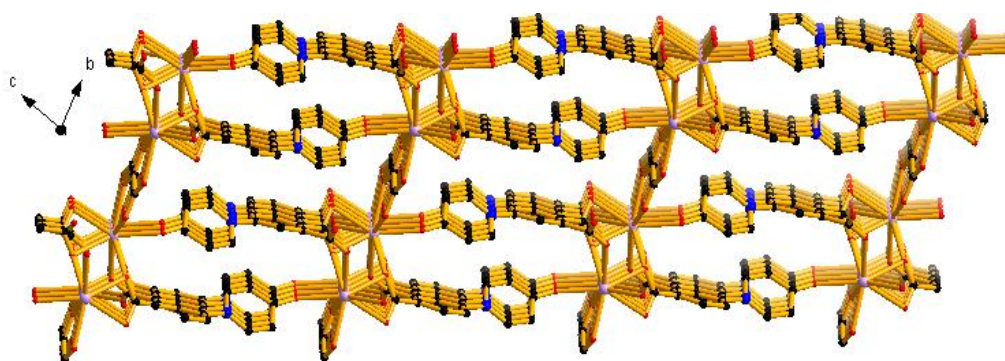

**Fig. S4** Prospective view of 3D porous framework with open channels viewed along the  $[011]$  direction in **1**.

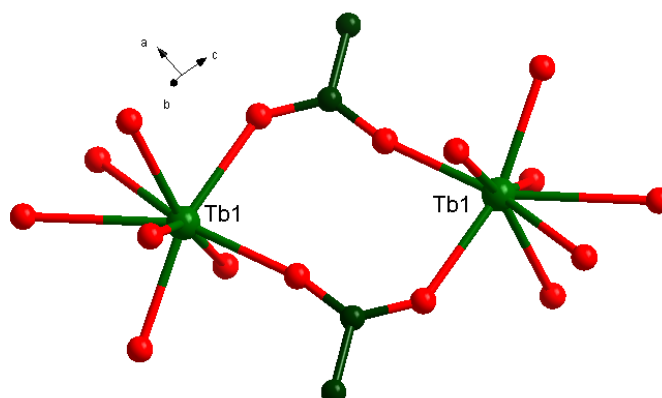

**Fig. S5.** View of an individual dinuclear Tb<sub>2</sub> units linked by the carboxylic group from HDDP ligands viewed approximately down the *ac*-plane in **3**.

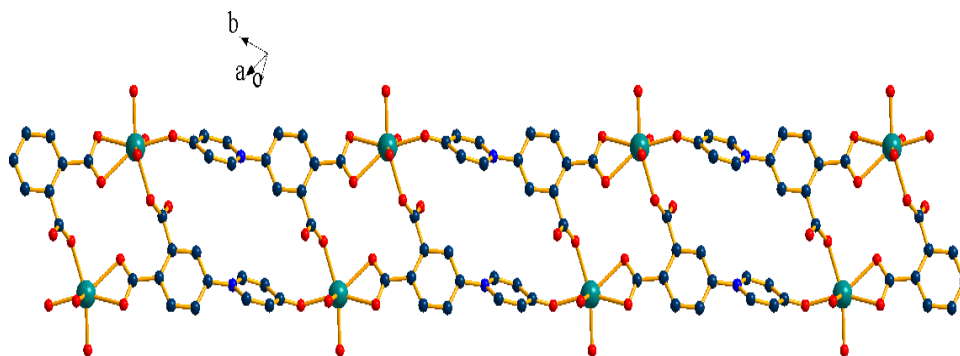

**Fig. S6.** Projective view of 1D double chain structure of **3** viewed along a *b* plane

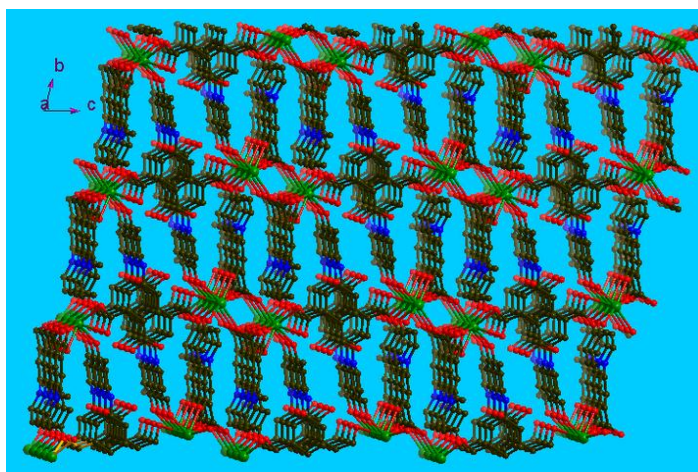

**Fig. S7.** Projective view of 3D packing structure of **3** viewed along *bc* plane

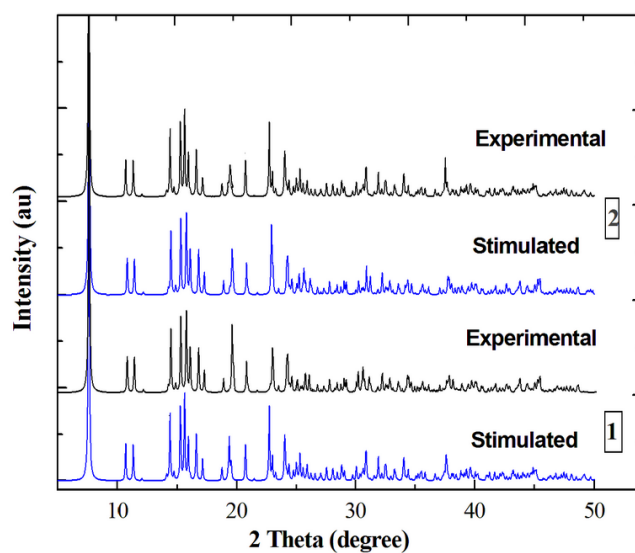

**Fig. S8.** Comparison of the experimental and simulated PXRD patterns for **1** and **2**

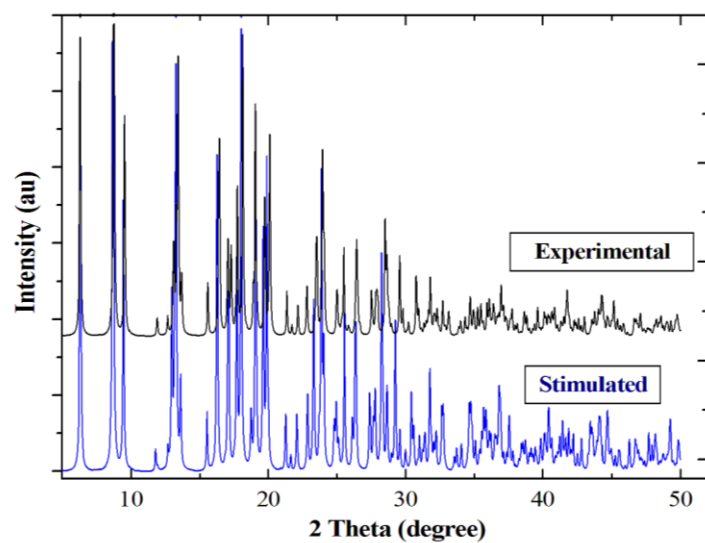

**Fig. S9** The X-ray powder diffraction diagrams of microcrystalline powders of **3** (Tb)

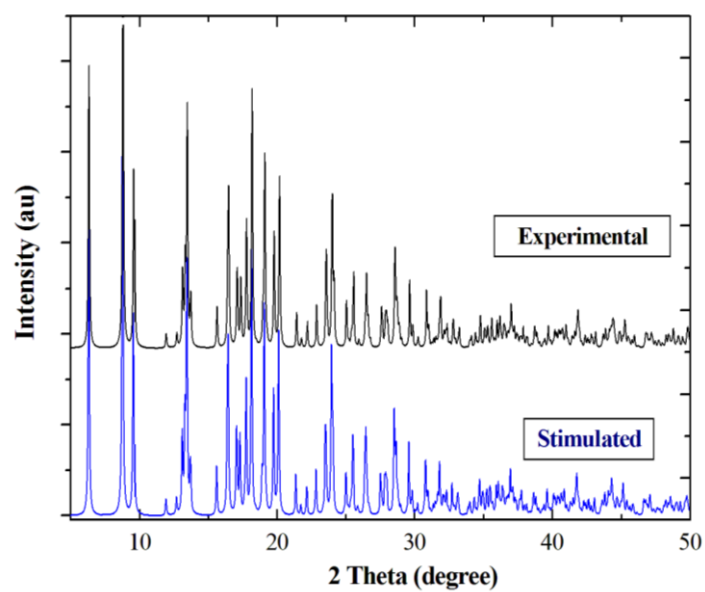

**Fig. S10** The X-ray powder diffraction diagrams of microcrystalline powders of **4** (Yb)

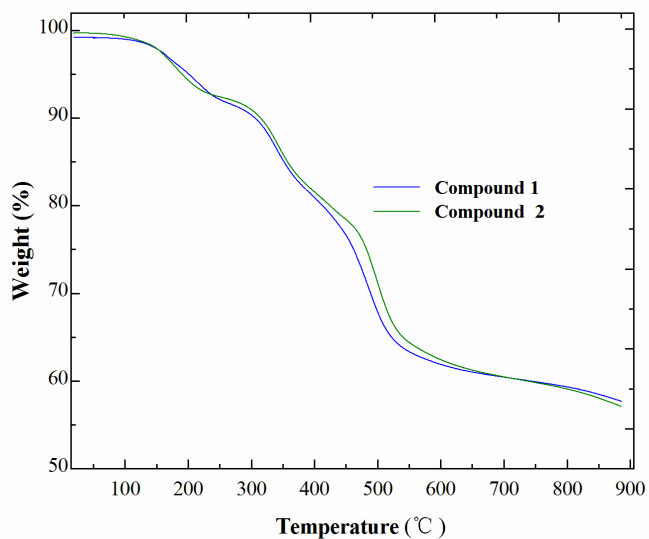

**Fig. S 11.** The TGA traces for compounds **1** and **2**

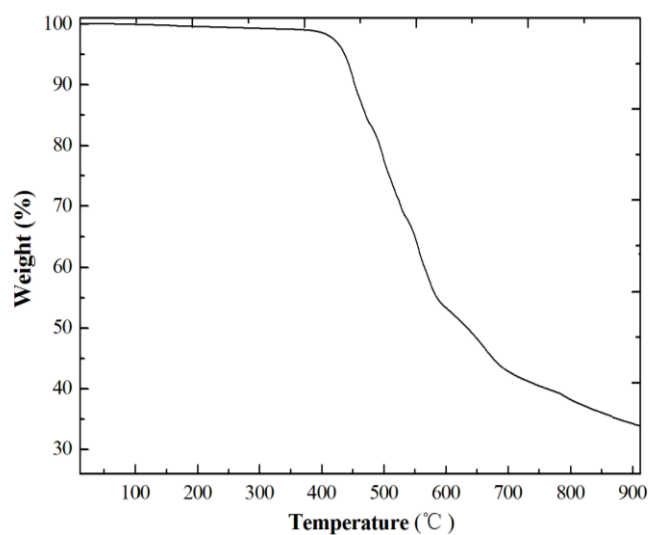

**Fig. S12.** The thermal gravimetric analysis (TGA) diagram for powder **3**

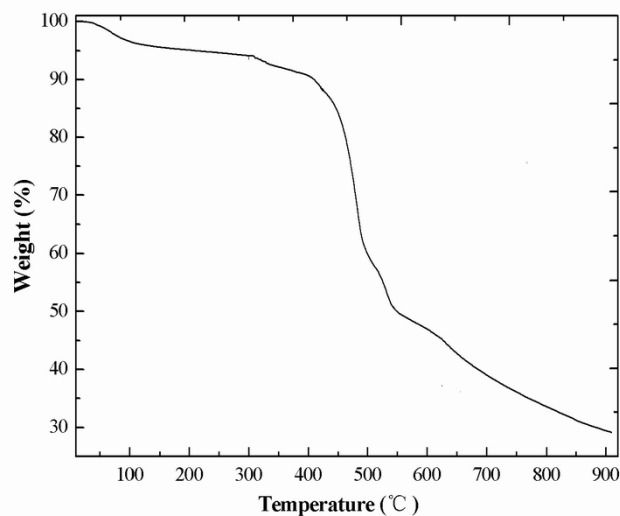

**Fig. S13** The thermal gravimetric analysis (TGA) diagram for powder **4**

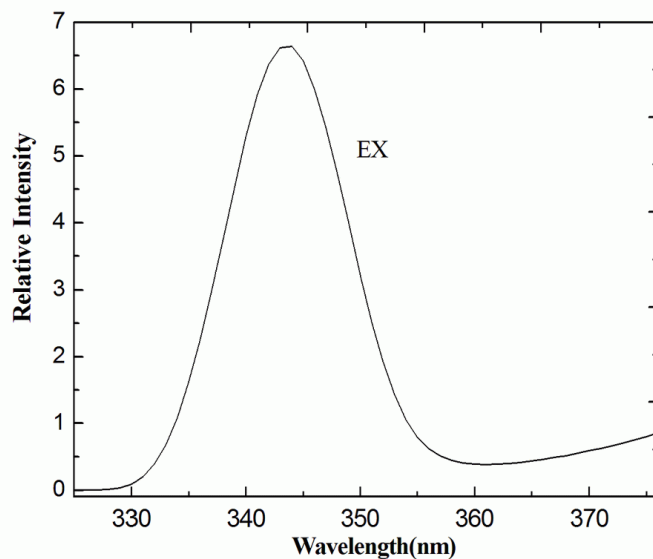

**Fig. S14** Excitation spectrum of compound **1** in solid state.

### Fitting of the compound **1** based on $\text{Sm}^{3+}$ ion and equations employed

The  ${}^6\text{H}$  ground term for  $\text{Sm}(\text{III})$  is split by spin-orbit coupling into six levels. The energies,  $E(J)$ , increase from  ${}^6\text{H}_{5/2}$ , these energy is

$$E(J) = \lambda[J(J + 1) - 35/4]/2 \quad \text{eq (S1)}$$

The energy of the ground state is again taken as the origin. The spin-orbit coupling parameter is of the order of  $200 \text{ cm}^{-1}$ , such that the first excited state  ${}^6\text{H}_{7/2}$  can be populated at room temperature and above. The expression of the magnetic susceptibility taking into account the six states arising from  ${}^6\text{H}$  is:

$$\chi_M = \frac{\sum_{J=5/2}^{15/2} (2J + 1) \chi(J) \exp[-E(J)/kT]}{\sum_{J=5/2}^{15/2} (2J + 1) \exp[-E(J)/kT]} \quad \text{eq (1)}$$

The  $\chi(J)$  is given by eq (2) and  $E(J)$  by eq (1).  $\chi_M$  may be expanded as:

$$\chi = \frac{N\beta^2}{3kTx} \frac{a_1x + b_1 + (a_2x + b_2)e^{-7x/2} + (a_3x + b_3)e^{-8x} + (a_4x + b_4)e^{-27x/2} + (a_5x + b_5)e^{-20x} + (a_6x + b_6)e^{-55x/2}}{3 + 4e^{-7x/2} + 5e^{-8x} + 6e^{-27x/2} + 7e^{-20x} + 8e^{-55x/2}}$$

$$x = J / kT \quad \text{eq (2)}$$

Parameters and value are as follow

$$a_1 = 2.143; b_1 = 7.347$$

$$a_2 = 42.92; b_2 = 1.641$$

$$a_3 = 283.7; b_3 = -0.6571$$

$$a_4 = 620.6; b_4 = -1.9400$$

$$a_5 = 1122; b_5 = -2.835$$

$$a_6 = 1813; b_6 = -3.556$$

Equation (3) was assigned as a molecular field approximation

$$\chi = \frac{\chi'}{1 - (2zj'/Ng^2\beta^2)\chi'} \quad eq (3)$$

## 2 Supporting characterizations

IR spectra of complexes **1-4** .

For **1**, IR (KBr pellet,  $\text{cm}^{-1}$ ): 3384s, 3181br, 2973m, 1594s, 1529s, 1452s, 1410m, 1338s, 1279m, 1212s, 867m, 810s, 793s, 660s, 569m.

For **2**, IR: 3402s, 3122br, 2953m, 1623s, 1591s, 1413m, 1374s, 1279s, 1087s, 1245s, 929vs, 827s, 556m.

For **3**, IR: 3420vs, 1734s, 1626vs, 1612s, 1442s, 1423s, 1392s, 1329m, 1279s, 1068s, 832s, 763s, 698s.

For **4**, IR: 3415vs, 1762s, 1686vs, 1622s, 1417s, 1392s, 1319m, 1273s, 1012vs, 873s, 810m, 663s.

## 3 Additional Tables

**Table S1** Selected bond lengths [Å] and angles [°] for complexes **1–4**

| Polymer 1           |            |                     |            |                     |            |
|---------------------|------------|---------------------|------------|---------------------|------------|
| Nd(1)-O(3)          | 2.443(2)   | Nd(1)-O(6)          | 2.445(2)   | Nd(1)-O(5)#1        | 2.460(2)   |
| Nd(1)-O(7)#2        | 2.476(2)   | Nd(1)-O(4)#3        | 2.498(2)   | Nd(1)-O(1)          | 2.515(2)   |
| Nd(1)-O(1W)         | 2.522(2)   | Nd(1)-O(1)#4        | 2.573(2)   | Nd(1)-O(2)#4        | 2.625(2)   |
| O(3)-Nd(1)-O(6)     | 139.20(7)  | O(3)-Nd(1)-O(5)#1   | 97.37(8)   | O(6)-Nd(1)-O(5)#1   | 70.41(8)   |
| O(3)-Nd(1)-O(7)#2   | 148.95(7)  | O(6)-Nd(1)-O(7)#2   | 66.76(7)   | O(5)#1-Nd(1)-O(7)#2 | 73.65(8)   |
| O(3)-Nd(1)-O(4)#3   | 76.13(7)   | O(6)-Nd(1)-O(4)#3   | 136.15(7)  | O(5)#1-Nd(1)-O(4)#3 | 143.35(7)  |
| O(7)#2-Nd(1)-O(4)#3 | 93.30(8)   | O(3)-Nd(1)-O(1)     | 66.09(7)   | O(6)-Nd(1)-O(1)     | 73.14(7)   |
| O(5)#1-Nd(1)-O(1)   | 75.90(7)   | O(7)#2-Nd(1)-O(1)   | 135.70(7)  | O(4)#3-Nd(1)-O(1)   | 129.55(8)  |
| O(3)-Nd(1)-O(1W)    | 71.19(8)   | O(6)-Nd(1)-O(1W)    | 133.93(8)  | O(5)#1-Nd(1)-O(1W)  | 72.09(8)   |
| O(7)#2-Nd(1)-O(1W)  | 77.78(8)   | O(4)#3-Nd(1)-O(1W)  | 71.70(8)   | O(1)-Nd(1)-O(1W)    | 121.60(7)  |
| O(3)-Nd(1)-O(1)#4   | 84.15(7)   | O(6)-Nd(1)-O(1)#4   | 82.26(7)   | O(5)#1-Nd(1)-O(1)#4 | 139.69(7)  |
| O(7)#2-Nd(1)-O(1)#4 | 122.17(7)  | O(4)#3-Nd(1)-O(1)#4 | 76.31(7)   | O(1)-Nd(1)-O(1)#4   | 67.97(7)   |
| O(1W)-Nd(1)-O(1)#4  | 143.27(7)  | O(3)-Nd(1)-O(2)#4   | 125.90(7)  | O(6)-Nd(1)-O(2)#4   | 69.82(7)   |
| O(5)#1-Nd(1)-O(2)#4 | 135.55(8)  | O(7)#2-Nd(1)-O(2)#4 | 73.07(7)   | O(4)#3-Nd(1)-O(2)#4 | 67.01(7)   |
| O(1)-Nd(1)-O(2)#4   | 110.11(6)  | O(1W)-Nd(1)-O(2)#4  | 127.03(7)  | O(1)#4-Nd(1)-O(2)#4 | 50.24(6)   |
| Polymer 2           |            |                     |            |                     |            |
| Sm(1)-O(1)          | 2.403(3)   | Sm(1)-O(2)#2        | 2.470(3)   | Sm(1)-O(4)#3        | 2.601(3)   |
| Sm(1)-O(6)          | 2.414(3)   | Sm(1)-O(1W)         | 2.479(3)   | O(2)-Sm(1)#2        | 2.470(3)   |
| Sm(1)-O(5)#1        | 2.425(3)   | Sm(1)-O(3)          | 2.493(3)   | O(3)-Sm(1)#3        | 2.524(3)   |
| Sm(1)-O(7)          | 2.442(3)   | Sm(1)-O(3)#3        | 2.524(3)   | Sm(1)-C(1)#4        | 2.917(3)   |
| O(1)-Sm(1)-O(6)     | 139.49(8)  | O(7)-Sm(1)-O(3)#3   | 122.36(9)  | O(5)#1-Sm(1)-O(1W)  | 72.38(10)  |
| O(1)-Sm(1)-O(5)#1   | 97.04(10)  | O(2)#2-Sm(1)-O(3)#3 | 76.18(9)   | O(7)-Sm(1)-O(1W)    | 77.41(10)  |
| O(6)-Sm(1)-O(5)#1   | 70.41(9)   | O(1W)-Sm(1)-O(3)#3  | 143.06(9)  | O(2)#2-Sm(1)-O(1W)  | 71.71(10)  |
| O(1)-Sm(1)-O(7)     | 148.24(8)  | O(3)-Sm(1)-O(3)#3   | 67.97(10)  | O(1)-Sm(1)-O(3)     | 66.42(9)   |
| O(6)-Sm(1)-O(7)     | 67.22(8)   | O(1)-Sm(1)-O(4)#3   | 126.38(8)  | O(6)-Sm(1)-O(3)     | 73.12(9)   |
| O(5)#1-Sm(1)-O(7)   | 74.27(10)  | O(6)-Sm(1)-O(4)#3   | 69.75(9)   | O(5)#1-Sm(1)-O(3)   | 75.53(10)  |
| O(1)-Sm(1)-O(2)#2   | 76.26(9)   | O(5)#1-Sm(1)-O(4)#3 | 135.47(10) | O(7)-Sm(1)-O(3)     | 136.16(8)  |
| O(6)-Sm(1)-O(2)#2   | 135.90(9)  | O(7)-Sm(1)-O(4)#3   | 72.66(9)   | O(2)#2-Sm(1)-O(3)   | 129.72(9)  |
| O(5)#1-Sm(1)-O(2)#2 | 143.66(9)  | O(2)#2-Sm(1)-O(4)#3 | 66.80(10)  | O(1W)-Sm(1)-O(3)    | 121.72(10) |
| O(7)-Sm(1)-O(2)#2   | 92.65(9)   | O(1W)-Sm(1)-O(4)#3  | 126.66(9)  | O(1)-Sm(1)-O(3)#3   | 84.30(9)   |
| O(1)-Sm(1)-O(1W)    | 70.86(10)  | O(3)-Sm(1)-O(4)#3   | 110.41(9)  | O(6)-Sm(1)-O(3)#3   | 82.42(9)   |
| O(6)-Sm(1)-O(1W)    | 133.97(10) | O(3)#3-Sm(1)-O(4)#3 | 50.73(8)   | O(5)#1-Sm(1)-O(3)#3 | 139.47(9)  |
| Polymer 3           |            |                     |            |                     |            |
| Tb(1)-O(10)#1       | 2.264(4)   | Tb(1)-O(5)#2        | 2.291(4)   | Tb(1)-O(9)#3        | 2.302(4)   |



|                      |            |                      |            |                     |            |
|----------------------|------------|----------------------|------------|---------------------|------------|
| Tb(1)-O(6)           | 2.338(4)   | Tb(1)-O(8)#4         | 2.402(4)   | Tb(1)-O(1)          | 2.428(4)   |
| Tb(1)-O(7)#4         | 2.477(4)   | Tb(1)-O(2)           | 2.765(6)   |                     |            |
| O(10)#1-Tb(1)-O(5)#2 | 83.09(16)  | O(10)#1-Tb(1)-O(9)#3 | 78.59(15)  | O(5)#2-Tb(1)-O(9)#3 | 84.05(15)  |
| O(10)#1-Tb(1)-O(6)   | 80.75(14)  | O(5)#2-Tb(1)-O(6)    | 85.64(13)  | O(5)#2-Tb(1)-O(8)#4 | 81.39(14)  |
| O(9)#3-Tb(1)-O(8)#4  | 79.92(14)  | O(6)-Tb(1)-O(8)#4    | 117.78(14) | O(10)#1-Tb(1)-O(1)  | 76.11(16)  |
| O(8)#4-Tb(1)-O(1)    | 122.32(15) | O(9)#3-Tb(1)-O(1)    | 103.47(17) | O(6)-Tb(1)-O(1)     | 79.03(15)  |
| O(5)#2-Tb(1)-O(7)#4  | 114.17(15) | O(9)#3-Tb(1)-O(7)#4  | 122.82(14) | O(6)-Tb(1)-O(7)#4   | 79.32(13)  |
| O(8)#4-Tb(1)-O(7)#4  | 53.03(12)  | O(1)-Tb(1)-O(7)#4    | 81.38(15)  | O(10)#1-Tb(1)-O(2)  | 106.78(17) |
| O(9)#3-Tb(1)-O(2)    | 73.40(16)  | O(6)-Tb(1)-O(2)      | 120.73(14) | O(8)#4-Tb(1)-O(2)   | 79.59(15)  |
| O(1)-Tb(1)-O(2)      | 48.89(16)  | O(7)#4-Tb(1)-O(2)    | 68.27(16)  |                     |            |
| <b>Polymer 4</b>     |            |                      |            |                     |            |
| Yb(1)-O(5)#1         | 2.205(2)   | Yb(1)-O(4)#2         | 2.221(2)   | Yb(1)-O(6)          | 2.227(2)   |
| Yb(1)-O(3)#3         | 2.280(2)   | Yb(1)-O(7)#4         | 2.305(3)   | Yb(1)-O(2)          | 2.353(2)   |
| Yb(1)-O(1)           | 2.419(2)   |                      |            |                     |            |
| O(5)#1-Yb(1)-O(4)#2  | 84.33(9)   | O(5)#1-Yb(1)-O(6)    | 79.94(9)   | O(4)#2-Yb(1)-O(6)   | 87.02(9)   |
| O(5)#1-Yb(1)-O(3)#3  | 80.70(9)   | O(4)#2-Yb(1)-O(3)#3  | 85.56(8)   | O(5)#1-Yb(1)-O(7)#4 | 78.52(10)  |
| O(6)-Yb(1)-O(7)#4    | 94.48(10)  | O(3)#3-Yb(1)-O(7)#4  | 87.10(10)  | O(4)#2-Yb(1)-O(2)   | 81.52(9)   |
| O(6)-Yb(1)-O(2)      | 79.59(9)   | O(3)#3-Yb(1)-O(2)    | 117.66(9)  | O(7)#4-Yb(1)-O(2)   | 116.19(10) |
| O(4)#2-Yb(1)-O(1)    | 114.54(9)  | O(6)-Yb(1)-O(1)      | 122.00(8)  | O(3)#3-Yb(1)-O(1)   | 78.07(8)   |
| O(7)#4-Yb(1)-O(1)    | 79.58(9)   | O(2)-Yb(1)-O(1)      | 54.21(7)   |                     |            |

Symmetry codes for **1**: #1, -x,-y+1,-z+1; #2, -x,-y+2,-z+1; #3, x-1,y+1,z; #4, -x+1,-y+2,-z+1; #5, x+1,y-1,z.  
 for **2**: #1, x,y+1,z; #2, -x+2,-y-1,-z+2; #3, x+1,y+1,z; #4, x+1,y-1,z; #5, x-1,y-1,z; #6, x,y-1,z; #7, x-1,y+1,z;  
 for **3**: #1, -x,-y+1,-z+1; #2, -x,-y+2,-z+1; #3, x-1,y+1,z; #4, -x+1,-y+2,-z+1; #5, x+1,y-1,z. for **4**: #1, x-1,y-1,  
 z; #2, x-1,y,z; #3, -x+1,-y,-z+1; #4, x+1,y-1,z; #5, x+1, y, z; #6,x+1,y+1, z. for **5**: #1, x+1,y+1,z; #2, x+1,  
 y, z; #3, x+1,y-1,z; #4, -x+1,-y+1,-z+1; #5, x-1, y, z; #6, x-1,y-1,z. #7 x-1,y+1, z.

**Table S2** The Hydrogen bond lengths (Å) and angles (°) for complexes **1** to **4**

| D-H...A              | d(D-H)    | d(H...A)  | d(D...A) | <(DHA) |
|----------------------|-----------|-----------|----------|--------|
| <b>Polymer 1</b>     |           |           |          |        |
| O(1W)-H(11)...O(3)#3 | 0.839(10) | 1.931(19) | 2.718(3) | 156(4) |
| O(1W)-H(12)...O(7)#5 | 0.843(10) | 2.057(17) | 2.861(3) | 160(3) |
| O(2W)-H(22)...O(5)   | 0.838(10) | 2.132(11) | 2.969(4) | 177(6) |
| <b>Polymer 2</b>     |           |           |          |        |
| O1(W)-H1(WB)... O(1) | 0.747     | 2.024     | 152.70   | 2.709  |
| O(1W)-H(1WB)...O(6)  | 0.747     | 2.479     | 118.24   | 2.908  |
| O(1W)-H1(WA)... O(7) | 0.732     | 2.137     | 165.43   | 2.851  |
| O1W-H1(WA)... O(6)   | 0.732     | 2.573     | 110.15   | 2.908  |
| O2(W)-H(2WB) ...O(5) | 0.811     | 2.153     | 170.62   | 2.956  |

| Polymer 3        |         |         |          |        |
|------------------|---------|---------|----------|--------|
| O(3)-H(3)...O(2) | 0.82    | 1.64    | 2.431(8) | 162.7  |
| Polymer 4        |         |         |          |        |
| O(9)-H(9)...O(8) | 0.81(6) | 1.64(6) | 2.399(5) | 155(7) |

Symmetry codes for **1**: #1, -x,-y+1,-z; #2, -x+1,-y+1, -z+1; #3, -x,-y,-z+1; #4, -x+1,-y,-z+1; #5, x-1,y,z; for **2**: #1 -x+1,-y,-z+1; #2 -x+1,-y+1,-z ;#3 -x,-y+1, -z; #4 -x,-y,-z; for **3**: #1, -x,-y+1,-z+1; #2, -x,-y+2,-z+1; #3, x-1, y+1,z; #4, -x+1,-y+2,-z+1; #5, x+1, y-1, z; for **4**: #1, x-1, y-1, z; #2, x-1, y, z; #3, -x+1,-y,-z+1; #4, x+1, y-1, z; #5, x+1, y, z.
